# Supplementary material
Source: PubMed Central journal article supplement (PMC7669645)
Supplement: NIHMS1629440-supplement-1.pdf [file NIHMS1629440-supplement-1.pdf]

## Supplementary Information

Steroid sulfatase stimulates intracrine androgen synthesis and is a therapeutic target for advanced prostate cancer

Armstrong, et al.

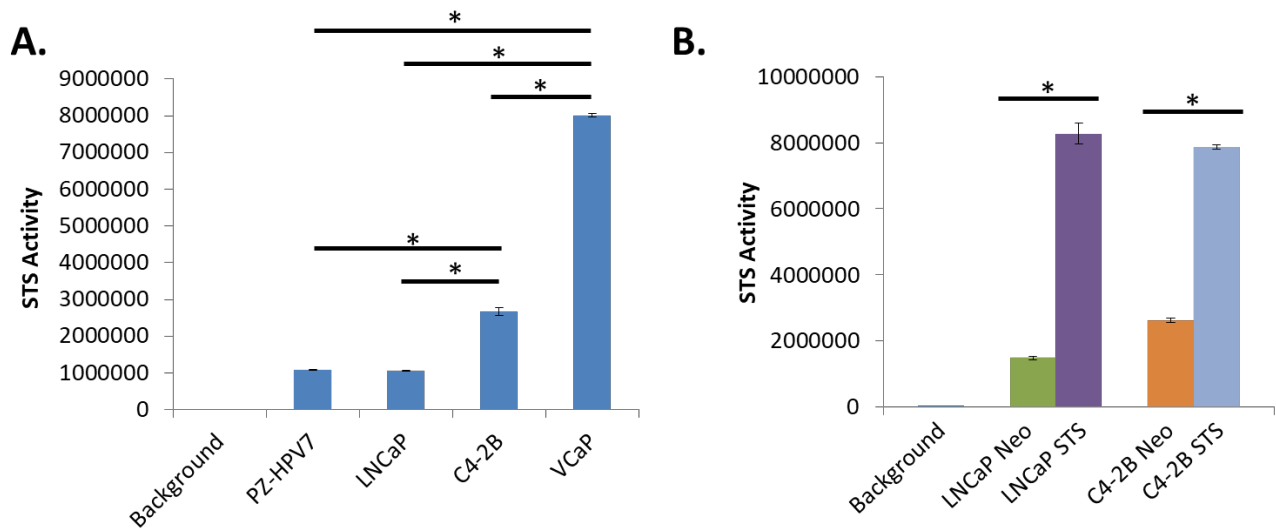

Supplemental Figure 1

**Supplemental Figure 1.** STS activity was assessed in prostate cancer cell lines **(A)** and in LNCaP and C4-2B cells stably over expressing Neo control and STS **(B)** by fluorometric assay. PZ-HPV7, LNCaP, C4-2B, VCaP, LNCaP Neo, LNCaP STS, C4-2B Neo and C4-2B STS cells were plated in 60 mm dishes overnight in DMEM (VCaP), Keratinocyte SFM (PZ-HPV7), or RPMI 1640 (all other cells). The cells were treated with 0.5 mM 4-methylumbelliferyl sulfate in phenol red free, charcoal stripped FBS media for 4 hours. One hundred microliters supernatant was added to 96-well plates with 50  $\mu$ L of 1 M Tris-HCL pH 10.4 to stop the reaction. Plates were read on a fluorescence microtiter plate reader at excitation and emission wavelengths of 355 and 460 nm, respectively. Statistical analysis was performed using two tailed Student's t test. “\*” denotes  $p \leq 0.05$  between indicated groups.
